# Supplementary material for: Subtypes of Patients with Mild to Moderate Airflow Limitation as Predictors of Chronic Obstructive Pulmonary Disease Exacerbation
Source: MDPI journal article supplement (doi:10.3390/jcm12206643), 2023-10-20
Supplement: s1 [file s1]

Supplement Table S1. Chest computed tomography (CT) findings

|                          | Chronic<br>bronchitis | Emphysema         | Young smokers  | Near-normal    | p value |
|--------------------------|-----------------------|-------------------|----------------|----------------|---------|
| Sequelae of tuberculosis | 6/121 (4.9%)          | 7/125 (5.6%)      | 6/117 (5.1%)   | 7/101 (6.9%)   | 0.923   |
| Emphysema                | 41/121 (33.8%)        | 61/125<br>(48.8%) | 56/117 (47.8%) | 34/101 (33.6%) | 0.017   |
| Bronchiectasis           | 21/121 (17.3%)        | 5/125 (4.0%)      | 8/117 (6.8%)   | 15/101 (14.8%) | 0.002   |

Chest CT was not performed in all patients.
