# Supplementary material for: Subtypes of Patients with Mild to Moderate Airflow Limitation as Predictors of Chronic Obstructive Pulmonary Disease Exacerbation
Source: MDPI journal article supplement (doi:10.3390/jcm12206643), 2023-10-20
Supplement: s1 [file s1]

Supplement Table S2. Univariate logistic regression analysis of risk factors associated with exacerbation of COPD

|                                  | Univariate analysis |             |                 |
|----------------------------------|---------------------|-------------|-----------------|
|                                  | OR                  | 95% CI      | <i>p</i> -value |
| Cluster                          |                     |             |                 |
| Near-normal                      | 1.000               |             |                 |
| Young smokers                    | 1.326               | 0.884-1.999 | 0.174           |
| Emphysema                        | 1.929               | 1.294-2.896 | 0.001           |
| Chronic bronchitis               | 1.395               | 0.923-2.118 | 0.116           |
| Age                              | 1.012               | 0.994-1.031 | 0.203           |
| Female                           | 1.414               | 0.852-2.313 | 0.173           |
| Body mass index                  | 0.976               | 0.935-1.019 | 0.273           |
| Smoking status                   |                     |             |                 |
| Never                            | 1.000               |             |                 |
| Former                           | 0.996               | 0.602-1.688 | 0.987           |
| Current                          | 1.118               | 0.648-1.969 | 0.692           |
| Smoke pack-years                 | 1.004               | 0.999-1.010 | 0.150           |
| Past history of asthma diagnosis | 1.546               | 1.143-2.089 | 0.005           |
| FEV <sub>1</sub> % predicted     | 0.980               | 0.968-0.991 | 0.001           |
| FVC % predicted                  | 0.984               | 0.974-0.993 | 0.001           |
| DLco % predicted                 | 1.003               | 0.995-1.010 | 0.495           |
| Total lung capacity              | 1.007               | 0.992-1.022 | 0.351           |
| Vital capacity                   | 0.994               | 0.985-1.002 | 0.155           |
| Inspiratory capacity             | 0.993               | 0.987-0.999 | 0.034           |
| Functional residual capacity     | 1.009               | 1.003-1.016 | 0.005           |
| Residual volume                  | 1.007               | 1.002-1.012 | 0.003           |
| COPD assessment test             | 1.051               | 1.032-1.071 | 0.000           |
| SGRQ                             | 1.024               | 1.015-1.032 | 0.000           |
| 6-minute walk distance           | 0.998               | 0.997-0.999 | 0.005           |
| White blood cells                | 1.135               | 1.063-1.213 | 0.000           |

|                                 |       |             |       |
|---------------------------------|-------|-------------|-------|
| Red blood cells                 | 0.864 | 0.647-1.151 | 0.318 |
| Hemoglobin, g/dL                | 0.921 | 0.836-1.013 | 0.089 |
| Hematocrit, %                   | 0.974 | 0.944-1.006 | 0.110 |
| Platelet                        | 1.002 | 1.000-1.004 | 0.066 |
| Erythrocyte sedimentation rate  | 1.017 | 1.007-1.028 | 0.001 |
| Neutrophils                     | 1.012 | 0.998-1.026 | 0.085 |
| Lymphocytes                     | 0.989 | 0.973-1.005 | 0.191 |
| Monocytes                       | 0.873 | 0.814-0.933 | 0.000 |
| Eosinophils                     | 1.044 | 0.995-1.095 | 0.077 |
| Basophils                       | 0.838 | 0.578-1.179 | 0.329 |
| Albumin                         | 0.536 | 0.362-0.790 | 0.002 |
| Blood urea nitrogen             | 0.991 | 0.964-1.018 | 0.529 |
| Immunoglobulin E                | 1.000 | 0.999-1.001 | 0.645 |
| C-reactive protein              | 1.047 | 0.995-1.117 | 0.125 |
| Fibrinogen                      | 1.004 | 1.002-1.007 | 0.001 |
| D-dimer                         | 1.620 | 1.151-2.408 | 0.012 |
| Fractional exhaled nitric oxide | 1.012 | 0.986-1.037 | 0.350 |
| Myocardial infarction           | 1.809 | 0.974-3.326 | 0.057 |
| Heart failure                   | 0.448 | 0.149-1.1   | 0.108 |
| Peripheral vascular disease     | 0.963 | 0.335-2.462 | 0.939 |
| Diabetes mellitus               | 0.774 | 0.536-1.103 | 0.163 |
| Hypertension                    | 0.962 | 0.727-1.271 | 0.785 |
| Osteoporosis                    | 2.713 | 1.412-5.288 | 0.003 |
| Gastroesophageal reflux disease | 1.449 | 1.001-2.085 | 0.047 |
| Hyperlipidemia                  | 0.752 | 0.494-1.124 | 0.174 |
| Thyroid disease                 | 0.694 | 0.271-1.577 | 0.409 |
| Inflammatory bowel disease      | 0.420 | 0.022-2.618 | 0.429 |

COPD, chronic obstructive pulmonary disease; FEV<sub>1</sub>, forced expiratory volume in one second; FVC, forced vital capacity;

DLco, carbon monoxide diffusing capacity; SGRQ, St. George's Respiratory Questionnaire.
